# Supplementary material for: Consequences of Workplace Ostracism: A Meta-Analytic Review
Source: Front Psychol. 2021 Aug 2;12:641302. doi: 10.3389/fpsyg.2021.641302 (PMC8365139; doi:10.3389/fpsyg.2021.641302)
Supplement: Supplementary file 3 [file Table_2.XLS]

## Sheet: Data
ENTER OR PASTE DATA IN YELOW AREA, DO NOT DELETE ANY BLUE COLORED CELLS, THEY CONTAIN FORMULAS
OPTIONS:	ENTER "B" TO CORRECT FOR RELIABILITY BEFORE CORRECTING FOR RANGE RESTRICTION - Indirect RR												A
	ENTER "A" TO CORRECT AFTER RANGE RESTRICTION - Direct RR
	ENTER THE TWO SAMPLE SIZES WHERE YOU WANT TO SET THE DIVISION IN THE THREE WEIGHTING CATEGORIES												75	200
REQUIRED DATA							META-ANALYSES COMPUTATIONS TABLE
N	r-obs	r-yy	r-xx	u			W(1,2,3)-N	r-obs*N	r-obs*W(1,2,3)	U	A	w-I	w-I(w(1,2,3))	r-cor1	r-cor2	(devobs)sq*N	(devobsfrommean(1,2,3))sq*N	N*(1-r-mean0-sq)sq/N-1	N*(1-r-mean1-sq)sq/N-1	a-I*N*(1-r-mean0-sq)/N-1	r-cor2*N	r-cor2*W(1,2,3)	r-cor2*W-I	r-cor2*w-I(W(1,2,3)	(dev)sq*N	(devaboutmean-w(1,2,3))sq*w(1,2,3)	devsq*N*a-I	(dev)sq*Wi	(devaboutmean-w(1,2,3))sq*w-I(w(1,2,3))	N*(1-r-mean1)sq/N-1	var-e	var-ve	var-ve*N	var-ve-ref	var-ve-ref*N	var-ve-ref*Wi	var-ve-ref*W(1,2,3)	var-ve-ref*W-I(W(1,2,3))	alpha(a-i)
297	-0.26	0.9	0.905	1			3	-77.22	-0.78	1	0.902497	241.907	2.4435	-0.26	-0.28809	0.472975	0.168623	0.831	0.848229	0.831	-85.5627	-0.864269	-69.6908	-0.703947	0.762383	0.0030172	0.762383	0.585692	0.00251066	0.786307	0.00279798	0.00343521	1.02026	0.00343521	1.02026	0.831	0.0103056	0.00839394	1
68	-0.41	0.89	0.89	1			1	-27.88	-0.41	1	0.89	53.8628	0.7921	-0.41	-0.460674	0.824203	1.08252	0.840564	0.857991	0.840564	-31.3258	-0.460674	-24.8132	-0.3649	1.01077	0.0198447	1.01077	0.819923	0.0156429	0.795355	0.0123612	0.0156056	1.06118	0.0156056	1.06118	0.840564	0.0156056	0.0123612	1
319	-0.387	0.742	0.914	1			3	-123.453	-1.161	1	0.823522	216.342	2.03456	-0.387	-0.469933	2.41972	3.39561	0.830807	0.848032	0.830807	-149.909	-1.4098	-101.666	-0.956109	5.48926	0.067617	5.48926	3.80607	0.0456489	0.786123	0.00260441	0.00384025	1.22504	0.00384025	1.22504	0.830807	0.0115207	0.00781323	1
208	-0.45	0.92	0.89	1			3	-93.6	-1.35	1	0.904876	170.31	2.4564	-0.45	-0.497306	4.68585	5.74356	0.832203	0.849457	0.832203	-103.44	-1.49192	-84.6964	-1.22158	5.2288	0.0945217	5.2288	4.36054	0.0770973	0.787445	0.00400098	0.00488639	1.01637	0.00488639	1.01637	0.832203	0.0146592	0.0120029	1
403	-0.41	0.91	0.9	1			3	-165.23	-1.23	1	0.904986	330.057	2.457	-0.41	-0.453046	4.88462	6.41555	0.830263	0.847476	0.830263	-182.577	-1.35914	-149.531	-1.11313	5.26414	0.0532607	5.26414	4.42217	0.0433975	0.785608	0.0020602	0.00251551	1.01375	0.00251551	1.01375	0.830263	0.00754654	0.00618061	1
235	-0.26	0.87	0.89	1			3	-61.1	-0.78	1	0.879943	181.96	2.3229	-0.26	-0.295474	0.374239	0.133422	0.831742	0.848986	0.831742	-69.4363	-0.886421	-53.7645	-0.686356	0.440216	0.00177577	0.440216	0.318253	0.0014138	0.787008	0.00353933	0.004571	1.07419	0.004571	1.07419	0.831742	0.013713	0.010618	1
225	-0.18	0.97	0.97	1			3	-40.5	-0.54	1	0.97	211.702	2.8227	-0.18	-0.185567	3.23494	2.42554	0.8319	0.849147	0.8319	-41.7526	-0.556701	-39.285	-0.5238	5.27996	0.054058	5.27996	4.87368	0.0511219	0.787158	0.00369733	0.00392957	0.884153	0.00392957	0.884153	0.8319	0.0117887	0.011092	1
93	-0.27	0.96	0.919	1			2	-25.11	-0.54	1	0.939276	82.0483	1.76448	-0.27	-0.287455	0.0831776	0.0177818	0.837205	0.854562	0.837205	-26.7333	-0.574911	-23.5852	-0.507209	0.244742	0.00209275	0.244742	0.203807	0.00188545	0.792177	0.0090022	0.0102038	0.948953	0.0102038	0.948953	0.837205	0.0204076	0.0180044	1
243	-0.22	0.88	0.86	1			3	-53.46	-0.66	1	0.869943	183.902	2.2704	-0.22	-0.25289	1.55156	0.989972	0.831625	0.848867	0.831625	-61.4523	-0.758671	-46.5071	-0.574162	1.79157	0.013432	1.79157	1.31015	0.0102692	0.786897	0.00342232	0.0045221	1.09887	0.0045221	1.09887	0.831625	0.0135663	0.010267	1
242	-0.22	0.88	0.86	1			3	-53.24	-0.66	1	0.869943	183.146	2.2704	-0.22	-0.25289	1.54517	0.985899	0.831639	0.848881	0.831639	-61.1994	-0.758671	-46.3157	-0.574162	1.7842	0.013432	1.7842	1.30476	0.0102692	0.786911	0.00343652	0.00454086	1.09889	0.00454086	1.09889	0.831639	0.0136226	0.0103096	1
88	-0.06	0.74	0.83	1			2	-5.28	-0.12	1	0.783709	54.0496	1.2284	-0.06	-0.076559	5.06484	4.40869	0.837722	0.85509	0.837722	-6.73719	-0.153118	-4.13798	-0.0940451	6.0497	0.118335	6.0497	3.67447	0.0728855	0.792667	0.00951957	0.0154991	1.36392	0.0154991	1.36392	0.837722	0.0309983	0.0190391	1
2421	Number of studies			11			29	-726.073	-8.231			1909.29	22.8628			25.1413	25.7672	9.16667	9.35672	9.16667	-820.125	-9.27429	-643.993	-7.31941	33.3457	0.441387	33.3457	25.6795	0.332142	8.67366			11.8056	0.0735495	11.8056	9.16667	0.163734	0.126082

## Sheet: Results
META-ANALYSES RESULTS
	BARE BONES	Psychometric
	N - WEIGHTING	N*A*A - WEIGHTING
r-mean	-0.299906	-0.337295
SD-true	0.0812303	0.0929984
10%CV	-0.403881	-0.456333
90%CV	-0.195931	-0.218257
SE(Whitener)	0.0307165	0.0336139
95%LCL(Whitener)	-0.360111	-0.403178
95%UCL(Whitener)	-0.239702	-0.271412
%-acc	0.364606	0.356964
SD-corr	0.101905	0.115973
SD-artifact	0.061533	0.0692899
var-obs/total	0.0103847	0.0134498
var-error	0.00378631	0.00480109
var-true	0.00659836	0.00864869
Number of Correlations (K)	11
Combined N	2421
